# Supplementary material for: REVOLUTA and WRKY53 connect early and late leaf development in Arabidopsis
Source: PubMed Central journal article supplement (PMC4299279; doi:10.1242/dev.117689), 2014-12-15
Supplement: supp_dev.117689_DEV117689supp.pdf [file supp_dev.117689_DEV117689supp.pdf]

## Supplementary Material Xie et al.

### Supplementary methods

**GUS staining and histology.** For histochemical GUS staining, *REV::GUS (rev-9)* and *WRKY53::GUS* plants were incubated overnight in GUS staining solution (100mM NaPO<sub>4</sub> pH7.0, 10mM EDTA, 0.5mM K<sub>4</sub>Fe(CN)<sub>6</sub>, 0.5mM K<sub>3</sub>Fe<sub>6</sub>, 0.01% Triton-X and 1mM X-Gluc). Samples were cleared with an ethanol series. For histological sections, roots of ten day-old seedlings were stained overnight in GUS staining solution following transfer into fixative (50mM NaPh pH=7.2; 1% Glutaraldehyde; 4% Formaldehyde) for two days. Afterwards, the roots were dehydrated in an ethanol series (30%/ 50%/ 70% each for two hours) and finally stored in 100% ethanol prior embedding in Technovit (Heraeus). Two-micron sections were cut using a Leica microtome.

**Redox-DPI-ELISA.** The coding sequence of *REV* with and without the PAS domain was cloned into the pET-32b vector for expression of the proteins fused to a 6xHis-tag. The *E. coli* strain BL21-SI was used for protein expression. The cells were grown in 10ml of selective medium overnight and subsequently diluted 1:20 in a final volume of 100ml in medium without antibiotics. Protein expression was induced after 1h by the addition of 1mM IPTG and the cells were grown a further hour at 37°C. After centrifugation (2500g, 20min, 4°C) and washing (10mM Tris-HCl pH 7.5, 100mM NaCl), the bacterial pellet was resuspended in protein extraction buffer (4mM HEPES pH 7.5, 100mM KCl, 8% (v/v) glycerol, 1x complete proteinase inhibitor without EDTA (Roche) and protein extraction was performed by sonication under native conditions. The protein concentration of the crude extract was measured by

Bradford assay (Bio-Rad). Expression of the recombinant proteins was confirmed by Western blot and immune detection using anti-His-antibodies.

The DNA-protein interaction assay was basically performed as described before (Brand et al., 2010). 5' biotinylated complementary oligonucleotides were annealed (final concentration 2M) to get double-stranded DNA fragments. The double-stranded binding sites of REV in the *WRKY53* promoter (BS1 and BS2) were added to a streptavidin-coated ELISA plate (Nunc Immobilizer) for binding for 1h at 37°C. After blocking using blocking reagent (Roche) for 30min, blocking reagent was removed and 25µg crude extracts was added and incubated for 1h at room temperature. Crude extracts were pre-incubated with different concentrations of DTT and H<sub>2</sub>O<sub>2</sub> to examine a redox-state dependant binding of REV. In order to test reversibility of the redox-effect, first high concentrations of H<sub>2</sub>O<sub>2</sub> were added and subsequently oxidizing conditions were reversed by addition of DTT. After binding, biotinylated DNA-protein complexes were washed two times for 10min at room temperature (blocking solution, Qiagen) and incubated with Anti His-HRP conjugate antibodies (Qiagen) 1:1500 diluted in blocking solution for 1h at room temperature. After washing, interaction was detected by a peroxidase reaction with ortho-phenylenediamine (OPD-tablets, Agilent technologies (Dako)) for 15min in darkness. After stopping the reaction with 0.5M H<sub>2</sub>SO<sub>4</sub> solution, positive interactions which resulted in a yellow color could be measured with an ELISA-reader (TECAN Safire XFluor4).

### **Transformation of *Arabidopsis* Protoplasts and transient Promoter-GUS Expression.**

The protoplasts used for the transient expression assay were derived from a cell culture of *Arabidopsis thaliana* var. *Columbia 0*. Cells were transformed with 5 µg of

effector and reporter plasmid DNA each roughly following the protocol of Negrutiu et al. (1987). For details see the following protocol: <http://www.zmbp.uni-tuebingen.de/CentralFacilities/transf/index.html>. As an internal control 0.1 µg of a Luciferase construct was co-transfected. The protoplasts were incubated overnight in the dark and then used for GUS-assays. For the *WRKY53*-reporter, a 2.8kb promoter sequence upstream of the *WRKY53* start codon was cloned into the binary vector pBGWFS7.0 (Karimi et al., 2002) and served as the reporter construct. The *REVOLUTA* CDS in the pJAN33 vector (Weigel et al., 2003) served as an effector. The GUS activity assays were carried out as described by Jefferson (Jefferson et al., 1987). To normalize differences in protoplast transfection a luciferase-assay was performed using the Dual-Luciferase<sup>®</sup> Reporter Assay System from Promega following the user's manual (Promega, <http://www.promega.de/~media/Files/Resources/Protocols/Technical%20Bulletins/0/Luciferase%20Assay%20System%20Protocol.pdf>). In total 6 biological replicates with 3 technical replicates each were performed for the experiment.

**Chlorophyll measurements and phenotypic analysis.** For assessment of the leaf senescence state, color-coded leaves were used. Chlorophyll content of leaf No. 5 was measured using an atLeaf+ chlorophyll meter (<http://www.atleaf.com>). Total chlorophyll content of leaves can be obtained by converting the atLEAF+ values in SPAD and considering the relation among chlorophyll content and SPAD units (<http://www.atleaf.com>). Each leaf was measured in triplicate at three different positions. Chlorophyll was determined for three independent plants and values were averaged. In addition, expression of the senescence associated marker genes *SAG12* (At5g45890) encoding a cysteine protease and *SAG13* (At2g29350) encoding a short-

chain alcohol dehydrogenase was analyzed by qRT-PCR and normalized to the expression of the GAPDH gene (At1g13440). Lipid peroxidation was measured using the improved thiobarbituric acid-reactive-substances assay as described previously (Hodges et al., 1999). Leaf No. 6 of three different plants was homogenized in liquid nitrogen and 25 mg of the fine leaf tissue powder was used for analyzes.

### Supplementary figures

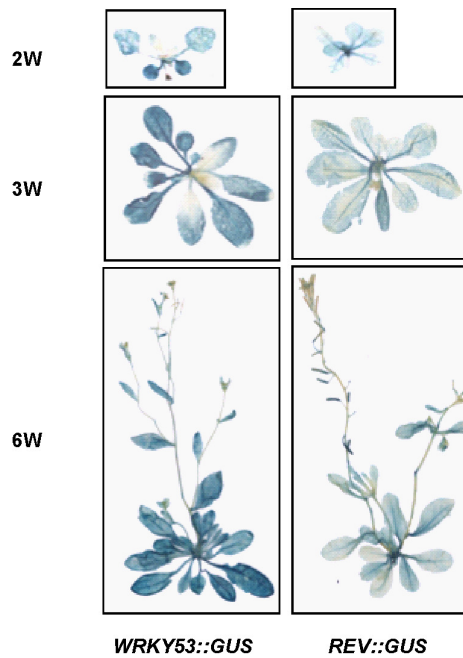

**Suppl Fig. S1.** Expression analysis of *REV* and *WRKY53*. Spatial expression patterns of *REV* and *WRKY53* using histochemical staining of 2-week to 6-week-old rosettes of p*WRKY53*::GUS and p*REV*::GUS plant lines.

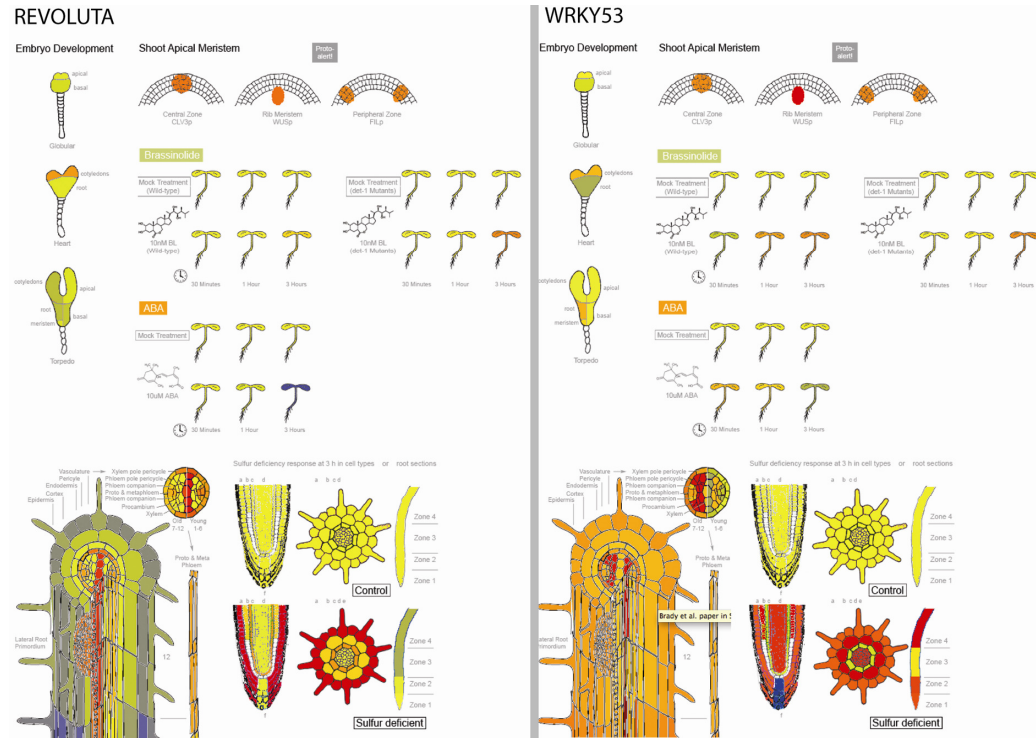

**Suppl Fig. S2.** Publicly available microarray-based expression analysis using Arabidopsis eFP browser showing co-expression of *REV* and *WRKY53* in different tissues. Plotted are images showing relative expression values where red color indicates high expression and blue color indicates low expression. Intermediated expression levels are displayed in yellow and variations between yellow and red and yellow and blue.

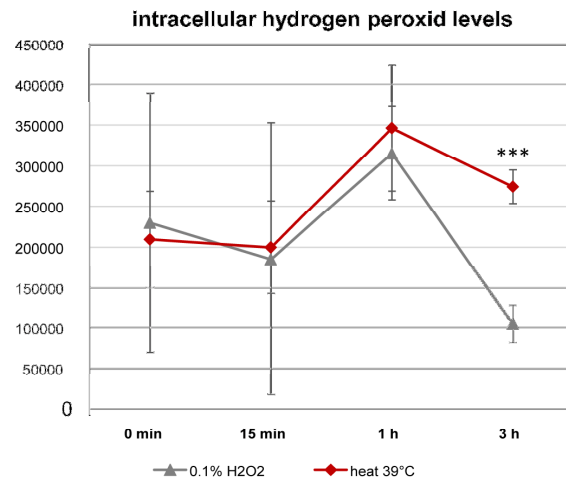

**Suppl. Fig. S3.** Measurement of intracellular H<sub>2</sub>O<sub>2</sub> contents using DCFDA after 01.% H<sub>2</sub>O<sub>2</sub> application or heat treatment. Error bars indicate standard deviation of at least three biological replicates, \*\*\* p<0.0005 (T-Test).

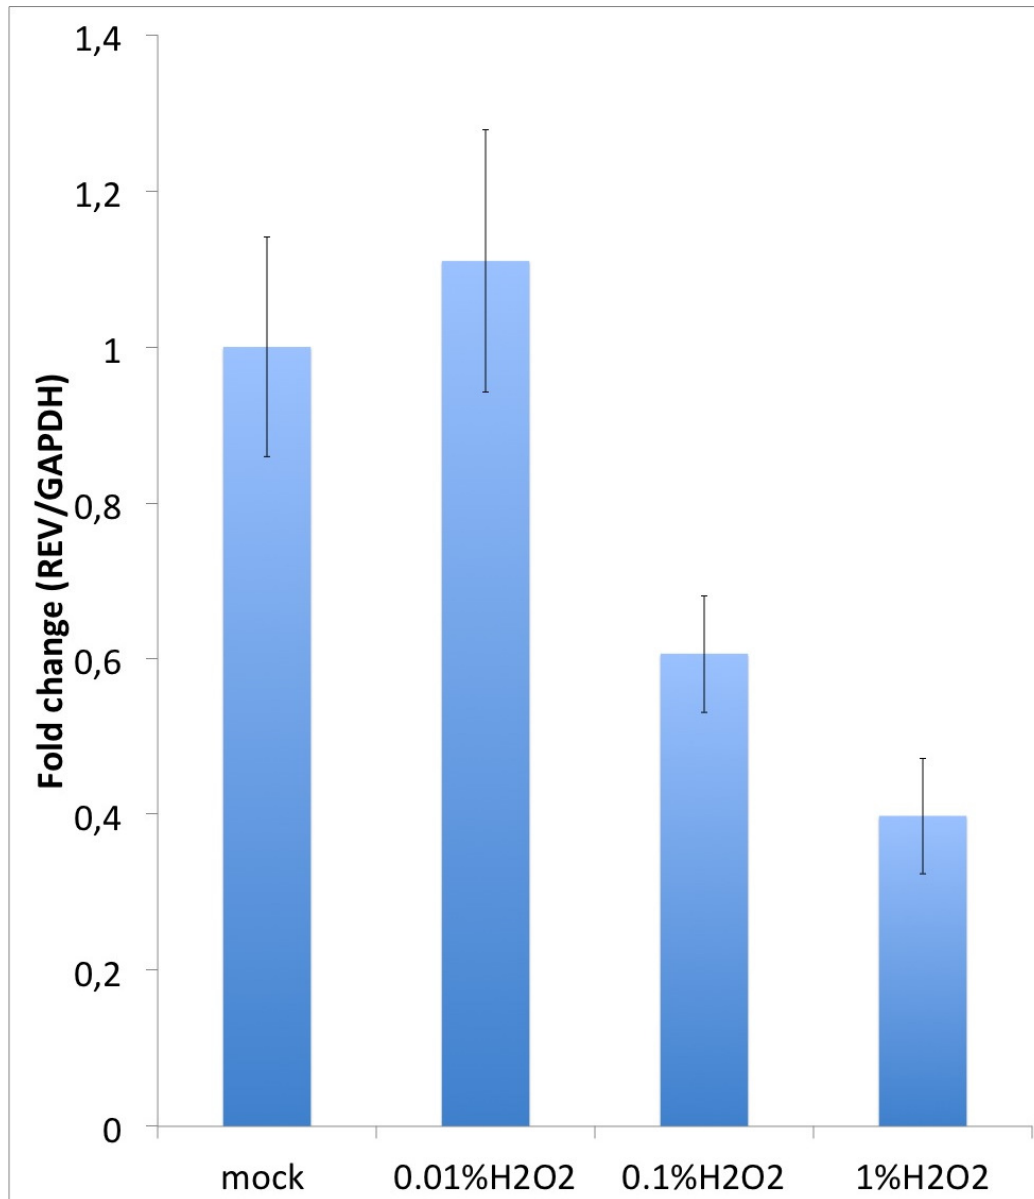

**Suppl. Fig. S4. Analysis of REV mRNA changes in response to hydrogen peroxide.** Real-time qPCR experiment showing *REV* expression in response to hydrogen peroxide treatment in wild type. 3-week old plants were treated with different concentrations of H<sub>2</sub>O<sub>2</sub> (0%, 0.01%, 0.1% and 1%) for 40 min. Plotted are representative relative expression changes (fold change) of the mean of four technical replicates including standard deviations. Similar expression changes have been observed in at least two independent biological experiments.

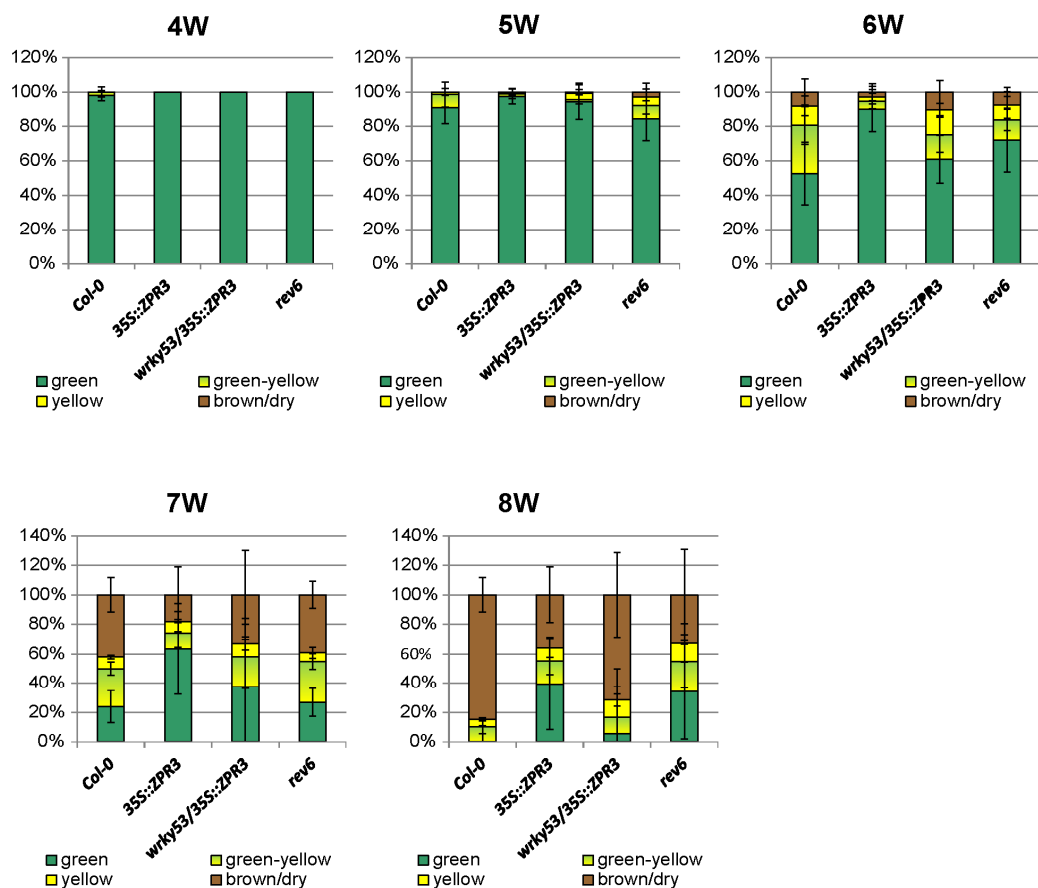

**Suppl. Fig. S5.** Quantitative evaluation of senescence in additional lines with altered HD-ZIPIII expression.

For a quantitative evaluation of leaf senescence plants were harvested in a weekly rhythm and leaves of at least ten plants were categorized into four groups according to their leaf color: 1) “green”, 2) leaves starting to get yellow from the tip as “yellow-green”, 3) completely yellow leaves as “yellow” and 4) dry and/or brown leaves as “brown/dry”. The percentages of each group with respect to total leaf numbers are presented. Error bars indicate standard deviations. Col-0 (wild type); *rev6* (different



*rev* mutant line); *35S::ZPR3* (plant line overexpressing the small leucine-zipper-type microProtein *ZPR3*, a micro protein inhibiting HD-ZIPIII function by protein-protein interaction); *wrky53/35S::ZPR3* (plant line overexpressing *ZPR3* in the *wrky53* mutant background).

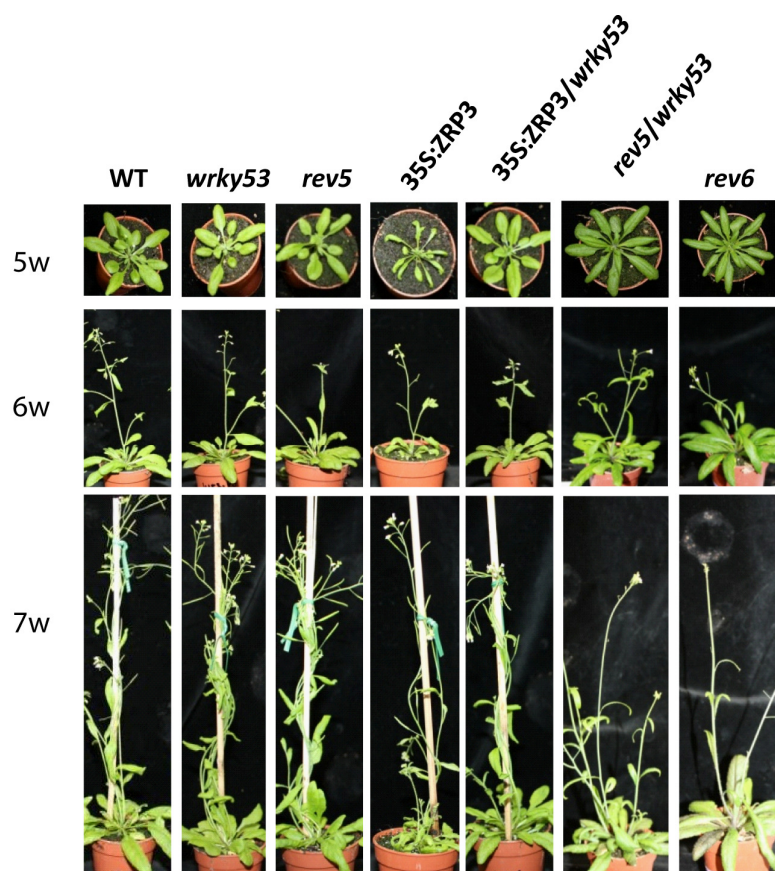

**Suppl. Fig. S6.** Comparison of plant development of WT, *wrky53*, *rev5*, *wrky53/rev5*, *35S::ZRP3* and *35S::ZRP3/wrky53* and *rev6* plants from 5-week to 7-week-old plants

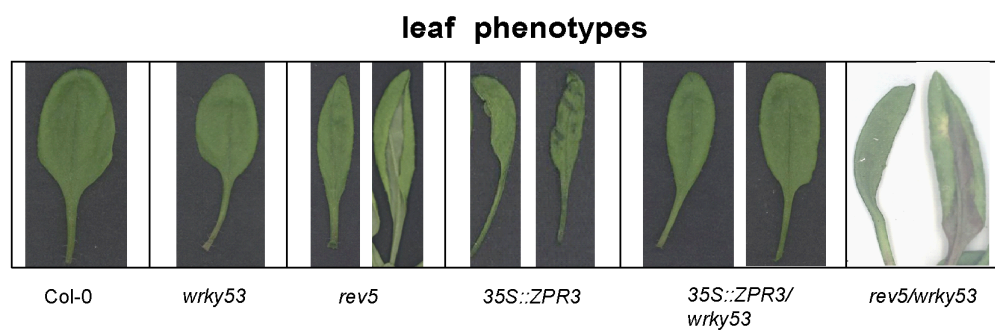

**Suppl. Fig S7.** Phenotype of leaves of 6-week-old plants of different plant lines.

**Table 1. Oligonucleotides**

| Primers      | Sequence                  | Use                                               |
|--------------|---------------------------|---------------------------------------------------|
| W53CpAf      | tgctcaagtttctgggaaaaa     | ChIP-qPCR (Primer I)                              |
| W53CpAr      | aagacgtgctgcctctgaa       | ChIP-qPCR (Primer I)                              |
| W53CpBf      | caatgaatgaatgacgcaaaa     | ChIP-qPCR (Primer II)                             |
| W53CpBr      | ttcaaaaggacaggattgga      | ChIP-qPCR (Primer II)                             |
| W53CpCf      | cgtatcacacagtgactggtttt   | ChIP-qPCR (Primer III)                            |
| W53CpCr      | ctgaccaagtcacatggaa       | ChIP-qPCR (Primer III)                            |
| qW53f        | aaactgttggcaacgaaac       | ChIP-qPCR (Primer IV)                             |
| qW53r        | aatggctggtttgactctgg      | ChIP-qPCR (Primer IV)                             |
| REVe56F      | ttctttgcctaattgcttgg      | rev5 genotyping (with rev5R and BaeI digest)      |
| rev5R        | tcataaaggggtcgaagcac      | rev5 genotyping (with REVe56F and BaeI digest)    |
| vam-F_rev6   | tgctgcttcagcttctcagt      | rev6 genotyping (with REV-3R and TaqI digest)     |
| REV-3R       | gaagcacctccaaccgtaga      | rev6 genotyping (with vam-F_rev6 and TaqI digest) |
| W53tDNAr     | gttcaagtcctgtgaacattcc    | wrky53 genotyping                                 |
| W53tDNAf     | ggcagtggtccagaatctcc      | wrky53 genotyping                                 |
| LB-Salk      | tggttcacgtagtgggccatcg    | wrky53 genotyping                                 |
| AtREV-topo_F | caccaacatacatgacatgtgaaat | Cloning of the pREV::REV::GFP construct           |
| AtREV-topo_R | cacaaaagaccagtttacaaggag  | Cloning of the pREV::REV::GFP construct           |
| qGAPDH_F     | aaagtgttccatccctcaa       | AT5G47180 qRT-qPCR                                |
| qGAPDH_R     | tcggtagacacaacatcatcct    | AT5G47180 qRT-qPCR                                |
| qWRKY53_F    | ggcagtggtccagaatctcc      | WRKY53 qRT-PCR                                    |
| qWRKY53_R    | gcctctctctgggcttattc      | WRKY53 qRT-PCR                                    |
| qSAG12_F     | ggaggaaaacaatcgtctacg     | SAG12 RT-qPCR                                     |
| qSAG12_R     | acggcgacatttttagtttgg     | SAG12 RT-qPCR                                     |
| qSAG13_F     | gtgccagagacgaaactc        | SAG13 RT-qPCR                                     |
| qSAG13_R     | gctgtaaactctgtggtc        | SAG13T-qPCR                                       |
| qHAT3_2f     | ggagtttcgtctccgaacag      | HAT3 RT-qPCR                                      |
| qHAT3_2r     | atcggagtttctctctcgaa      | HAT3 RT-qPCR                                      |
| qZFP8_F      | ccgccattatctctctctc       | ZFP8 RT-qPCR                                      |
| qZFP8_R      | gatgtccacctaagggttga      | ZFP8 RT-qPCR                                      |
| qIDD11_F     | tggcaacaacagattcgtg       | IDD11 RT-qPCR                                     |
| qIDD11_R     | gatggatcatggtggacaca      | IDD11 RT-qPCR                                     |
| qAT5G47180_F | caagcgcaacgagagtatcc      | ZFP8 RT-qPCR                                      |
| qAT5G47180_R | ttgggtgtagacggggtaa       | ZFP8 RT-qPCR                                      |
| qAT1G74940_F | ggtattgtgctgcgttggga      | AT1G74940 qRT-qPCR                                |
| qAT1G74940_R | acaattcaaacctcgtctcg      | AT1G74940 qRT-qPCR                                |
| qAT1G49200_F | tctgttcctcgggttcat        | AT1G49200 qRT-qPCR                                |
| qAT1G49200_R | cggcaagttcatctcaggtg      | AT1G49200 qRT-qPCR                                |

**Supplementary references**

Karimi, M., Inze, D. and Depicker, A. (2002). GATEWAY vectors for

Agrobacterium-mediated plant transformation. *Trends Plant Sci* 7, 193-195.

Weigel, M., Varotto, C., Pesaresi, P., Finazzi, G., Rappaport, F., Salamini, F. and

Leister, D. (2003). Plastocyanin Is Indispensable for Photosynthetic Electron Flow in

*Arabidopsis thaliana*. *Journal of Biological Chemistry* 278, 31286-31289.
